# Supplementary material for: Uncovering the balance of forces driving microtubule aster migration in C. elegans zygotes
Source: PubMed Central journal article supplement (PMC5838244; doi:10.1038/s41467-018-03118-x), 2018-03-05
Supplement: 41467_2018_3118_MOESM1_ESM.pdf [file 41467_2018_3118_MOESM1_ESM.pdf]

## Supplementary Figures

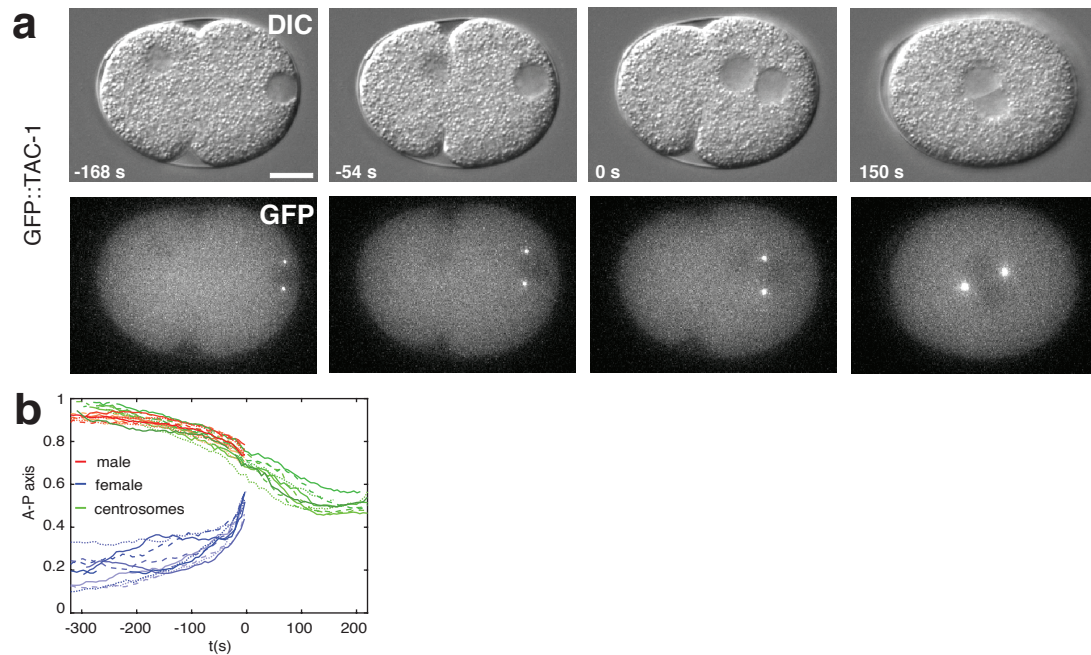

### Supplementary Figure 1

#### Imaging pronuclear migration and centration in one-cell *C. elegans* embryo.

**a** DIC (top panels) and GFP fluorescence microscopy (bottom panels – z-maximum projections) of embryo expressing GFP::TAC-1. Time is indicated in seconds and time 0 s is pronuclear meeting. Scale bar: 10  $\mu$ m.

**b** Pronuclear and centrosome midpoint positions along the A-P axis as a function of time for 10 representative GFP::TAC-1 embryos. Here and in other Supplementary Figures, position on the A-P axis is represented in normalized coordinates (0: anterior; 1: posterior).

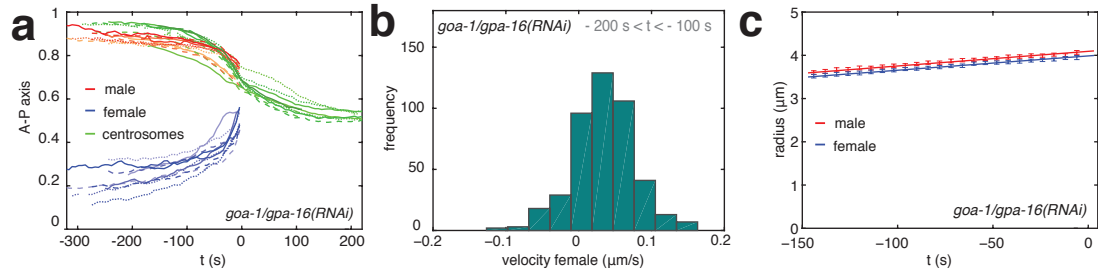

## Supplementary Figure 2

**Pronuclear and centrosome midpoint positions, as well as pronuclear velocities during the slow migration phase and pronuclei radii in *goa-1/gpa-16(RNAi)* embryos.**

**a** Pronuclear and centrosome midpoint positions along the A-P axis as a function of time for 10 representative *goa-1/gpa-16(RNAi)* embryos.

**b** Distribution of female pronucleus velocities during the slow phase of migration in *goa-1/gpa-16(RNAi)* embryos (-200 s < t < -100 s; n = 31; Kolmogorov-Smirnov test (two-sided) P = 0.56; mean:  $0.034 \pm 0.002 \mu\text{m s}^{-1}$ ; SD:  $0.042 \pm 0.001 \mu\text{m s}^{-1}$ ).

**c** Pronuclear radii as a function of time in *goa-1/gpa-16(RNAi)* embryos with SEM (n = 31). Red and blue lines: linear fit (male – slope:  $0.0034 \pm 0.0001 \mu\text{m s}^{-1}$ , offset:  $4.09 \pm 0.02 \mu\text{m}$ ; female - slope:  $0.0033 \pm 0.0001 \mu\text{m s}^{-1}$ , offset:  $3.99 \pm 0.01 \mu\text{m}$ ; errors are S.D.).

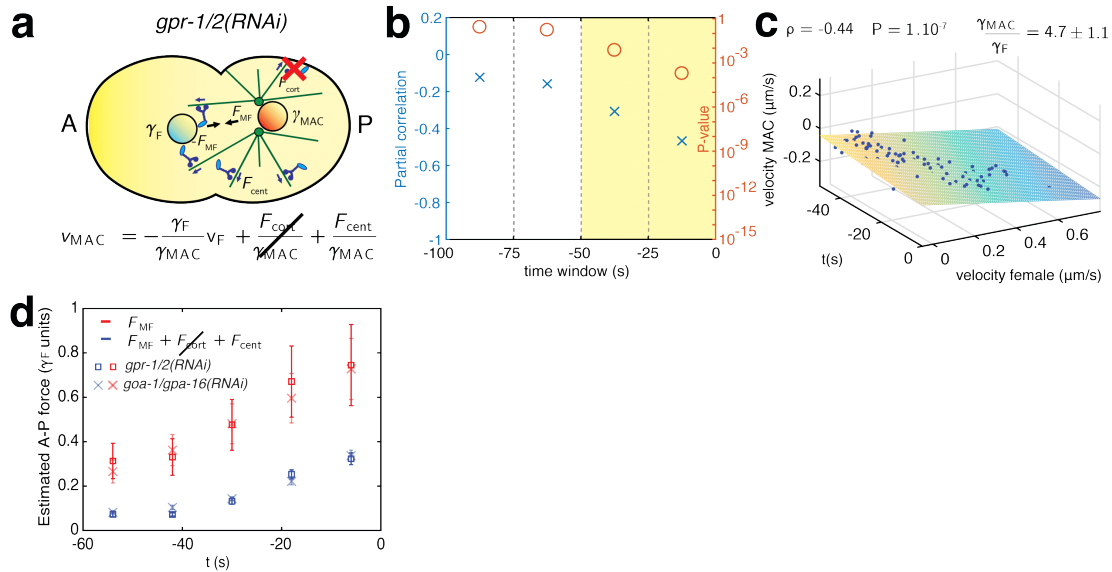

### Supplementary Figure 3

#### Pronuclear migration and centration upon depletion of cortical forces in *gpr-1/2(RNAi)* embryos.

**a** Schematics of pronuclear migration and centration in *gpr-1/2(RNAi)* embryos. Represented are the female and male pronuclei (blue and red disks, respectively), centrosomes (green dots), microtubules (green lines), dynein motors (blue) and dynein anchors (light blue ellipses); arrows represent exerted forces. Anterior (A) and posterior (P) sides are indicated.  $F_{MF}$ : force exerted between the male-asters complex and the female pronucleus;  $F_{cort}$ : force exerted by cortical dynein;  $F_{cent}$ : centering force;  $\gamma_F$ : drag coefficient of the female pronucleus;  $\gamma_{MAC}$ : drag coefficient of the male-asters complex. The red cross indicates depleted cortical dynein motors.

**b** Partial Pearson's correlation, controlling for time-variation, between pronuclear velocities along the A-P axis over successive time windows in *gpr-1/2(RNAi)* embryos ( $n = 20$ ). Each time-point corresponds to a time window of 25 s and the correlated time window ( $P < 0.05$ ) is highlighted in yellow (partial correlation: blue crosses; P-value (Student's t-test, two-sided): orange circles). Here and in panel c, velocities are calculated between successive frames 6 s apart.

**c** Velocity of male pronucleus as a function of time and of velocity of the female pronucleus during the correlated phase of pronuclear migration in *gpr-1/2(RNAi)* embryos (n = 20, -50 < t < 0 s time-window). Plane: linear fit  $v_{MAC} = -\frac{\gamma_F}{\gamma_{MAC}}v_F + v_0 + mt$  (  $v_0 = (-0.11 \pm 0.02) \mu\text{m s}^{-1}$ ;  $m = (-0.001 \pm 0.0005)\mu\text{m s}^{-2}$  ; errors are S.D.). The Pearson partial correlation coefficient  $\rho$  between the velocities of the male-asters complex and female pronucleus, controlling for time variation, its P-value (Student's t-test, two-sided) and the fitted ratio between the drag coefficients of the male-asters complex and female pronucleus are indicated.

**d** A-P forces acting on the male-asters complex and female pronuclei shortly before pronuclear meeting with SEM. Blue: force between pronuclei, estimated from the force acting on the female pronucleus in *gpr-12(RNAi)* embryos (blue squares, n = 20). The force is compatible with that determined in *goa-1/gpa-16(RNAi)* embryos (blue crosses, n = 31;  $\chi^2 = 9$ ; P = 0.11) embryos. Red: sum of the forces acting between pronuclei and the centering force, estimated as that acting on the male-asters complex in *gpr-12(RNAi)* (red squares, n= 20). The force is compatible with that measured in *goa-1/gpa-16(RNAi)* embryos (red crosses, n = 31;  $\chi^2 = 0.5$ ; P = 0.99).

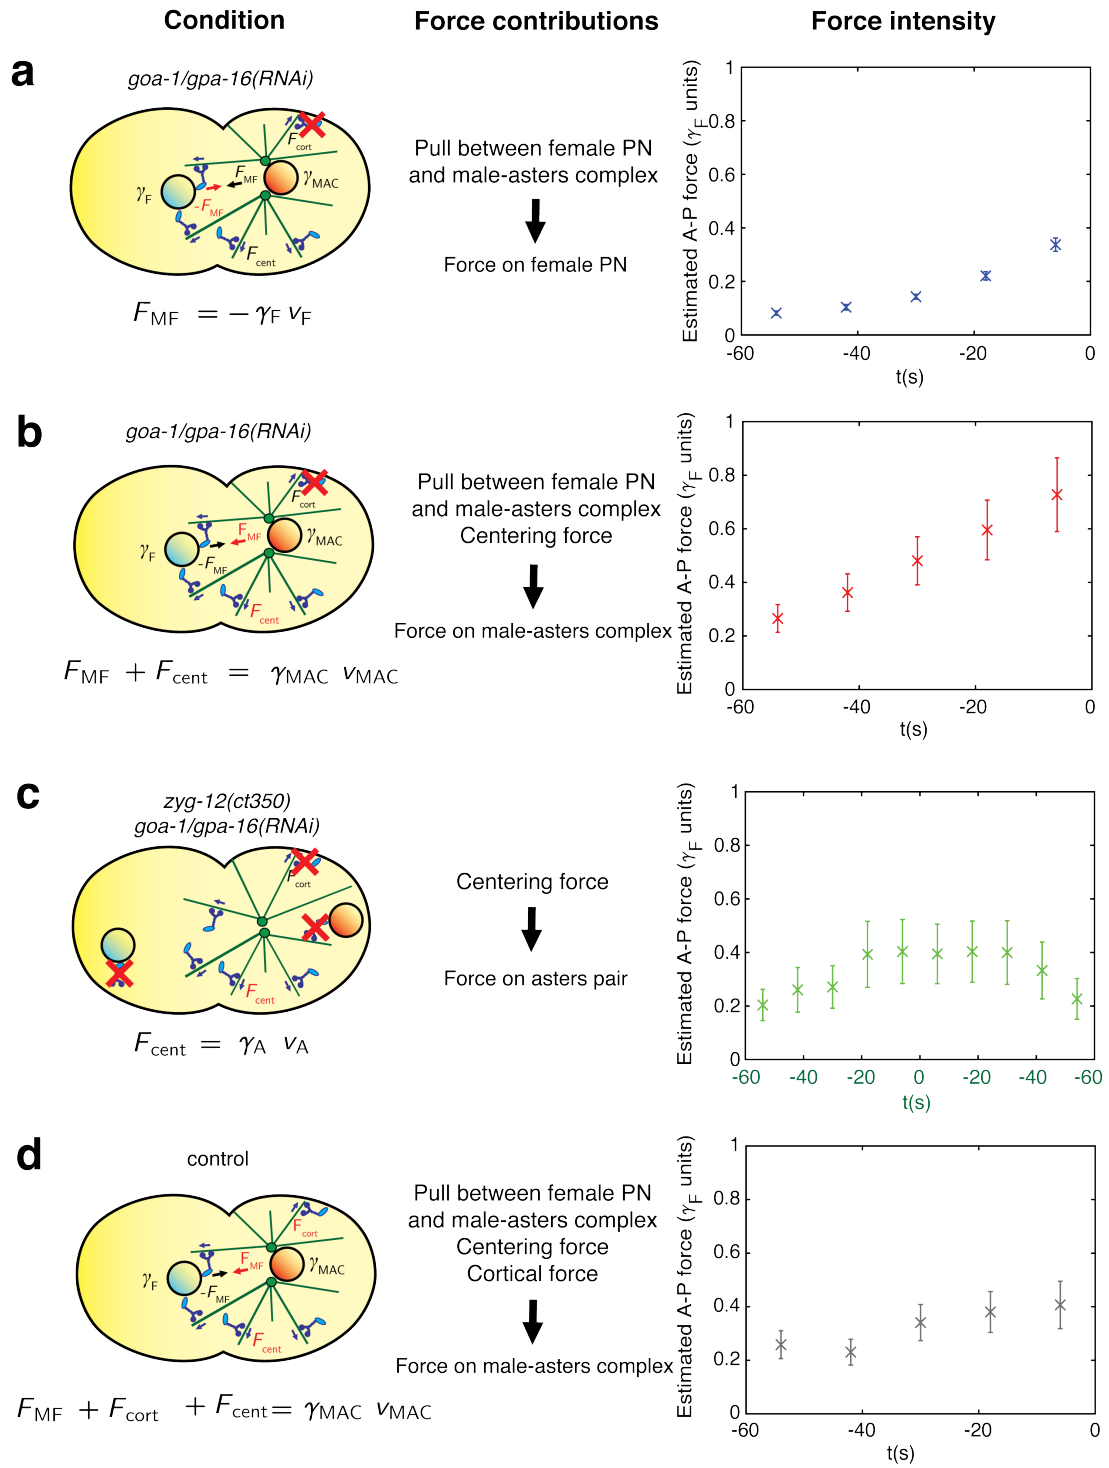

**Supplementary Figure 4**

**Overview of forces acting in pronuclear migration and centration in mutant/RNAi and control embryos.**

**a** Schematics (left) and intensity (right, A-P component, with SEM, n = 31) of the time evolution of the total force acting on the female pronucleus in *goa-1/gpa-16(RNAi)* embryos, corresponding to the force exerted between the male-asters complex and the female pronucleus. Here, as well as in b and in d, time 0 s is pronuclear meeting. The data presented in this figure recapitulates that presented in Fig. 1, 3 and 4.

**b** Schematics (left) and intensity (right, A-P component, with SEM, n = 31) of the time evolution of the total force acting on the male-asters complex in *goa-1/goa-16(RNAi)* embryos, corresponding to the sum of the force exerted between the male-asters complex and the female pronucleus, plus the centering force.

**c** Schematics (left) and intensity (right, A-P component, with SEM, n = 8) of the time evolution of the centering force in *zyg-12(ct350) goa-1/goa-16(RNAi)* embryos, which corresponds to the total force acting on the asters pair. Time 0 s is taken as the fitted half-centration time (indicated by the green lettering on the x-axis; Methods).

**d** Schematics (left) and intensity (A-P component, right) of the total force acting on the male-asters complex in control embryos (right, A-P component, with SEM, n = 33), corresponding to the sum of the force exerted between the male-asters complex and the female pronucleus, plus the centering force, as well as forces mediated by cortical dynein.

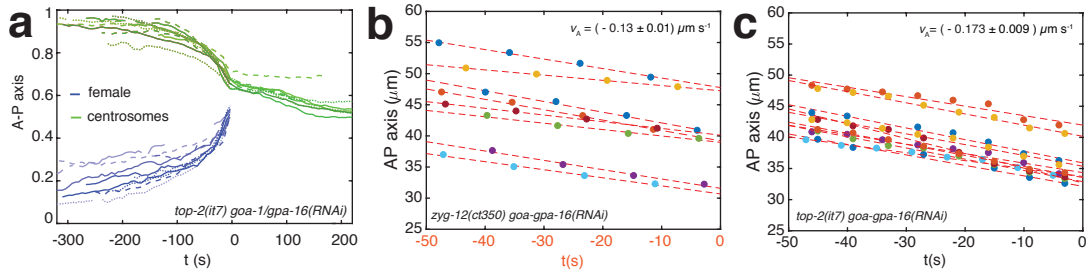

### Supplementary Figure 5

**Pronuclear and centrosome midpoint positions in *top-2(it7) goa-1/gpa-16(RNAi)* embryos, as well as comparison of centrosome midpoint velocities in *zyg-12(ct350) goa-1/gpa-16(RNAi)* and *top-2(it7) goa-1/gpa-16(RNAi)* embryos.**

**a** Centrosome midpoint positions along the A-P axis as a function of time for 10 representative *top-2(it7) goa-1/gpa-16(RNAi)* embryos.

**b, c** Comparison of centrosome midpoint velocities in *zyg-12(ct350) goa-1/gpa-16(RNAi)* (b, n = 8 embryos) and *top-2(it7) goa-1/gpa-16(RNAi)* embryos (c, n = 10 embryos). In *top-2(it7) goa-1/gpa-16(RNAi)* embryos, time 0 s is defined at pronuclear meeting. In *zyg-12(ct350) goa-1/gpa-16(RNAi)* embryos, since pronuclear meeting is not occurring, time 0 s is defined at the time at which centrosomes reach on average the same position that they reach in *top-2(it7) goa-1/gpa-16(RNAi)* embryos at pronuclear meeting (67% of AP-axis length; indicated by the orange lettering on the x-axis). Dots of different colors represent centrosome midpoint positions in different embryos. The slope of the A-P trajectory of the asters pair of each embryo in the  $-50 \text{ s} < t < 0 \text{ s}$  time-window is fitted with a linear function (dashed red lines). The average asters pair velocity  $v_A$  is calculated by averaging the slopes calculated for each individual embryo and for each condition. The average asters pair velocity is higher in *top-2(it7) goa-1/gpa-16(RNAi)* than in *zyg-12(ct350) goa-1/gpa-16(RNAi)* embryos (z-test;  $P = 0.007$  (two-sided)).

**Supplementary Table 1**

|   | Model                                                                               | Interaction         |                     |               | AIC |
|---|-------------------------------------------------------------------------------------|---------------------|---------------------|---------------|-----|
|   |                                                                                     | MAC- female<br>PN   | Time-dependency     | Variable drag |     |
| 1 | $V_{\text{MAC}} = V_0$                                                              | -                   | -                   | -             | 136 |
| 2 | $V_{\text{MAC}} = V_0 + mt$                                                         | -                   | + (linear)          | -             | 62  |
| 3 | $V_{\text{MAC}} = V_0 + mt + nt^2$                                                  | -                   | + (up to quadratic) | -             | 64  |
| 4 | $V_{\text{MAC}} = V_0 - \frac{\gamma_F}{\gamma_{\text{MAC}}} V_F$                   | + (linear)          | -                   | -             | 19  |
| 5 | $V_{\text{MAC}} = V_0 - \frac{\gamma_F}{\gamma_{\text{MAC}}} V_F + mt$ (Eq.3)       | + (linear)          | + (linear)          | -             | 16  |
| 6 | $V_{\text{MAC}} = V_0 - \frac{\gamma_F}{\gamma_{\text{MAC}}} V_F + mt + nt^2$       | + (linear)          | + (up to quadratic) | -             | 20  |
| 7 | $V_{\text{MAC}} = V_0 - \frac{\gamma_F}{\gamma_{\text{MAC}}} V_F + b V_F^2$         | + (up to quadratic) | -                   | -             | 20  |
| 8 | $V_{\text{MAC}} = V_0 - \frac{\gamma_F}{\gamma_{\text{MAC}}} V_F + b V_F^2 + mt$    | + (up to quadratic) | + (linear)          | -             | 17  |
| 9 | $V_{\text{MAC}} = V_0 - \frac{\gamma_F}{\gamma_{\text{MAC}(0)}} V_F + r't V_F + mt$ | + (linear)          | + (linear)          | + (*)         | 17  |

### Model selection analysis by the Akaike Information Criterion

Distinct models of the relationship between the velocity of the male-asters complex, that of the female pronucleus and time compared by the Akaike Information Criterion (AIC). The table reports whether the interaction between the male-asters complex (MAC) and female pronucleus (female PN), the time-dependency of the centering force, as well as a variable drag coefficient of the male-asters complex, are included in each model. The model that fits the dataset with highest quality, i.e. the one with the lowest AIC, is Model 5 (Eq. 3). (\*): in Model 9, the drag coefficient of the male-asters complex varies linearly with time.
